# Supplementary material
Source: publisher figshare collection journal article supplement (https://acs.figshare.com/ndownloader/files/4526518)

### Supporting Information:

**Figure S1.** Leaching amount of dinuclear cupric complexes in MSP supports.

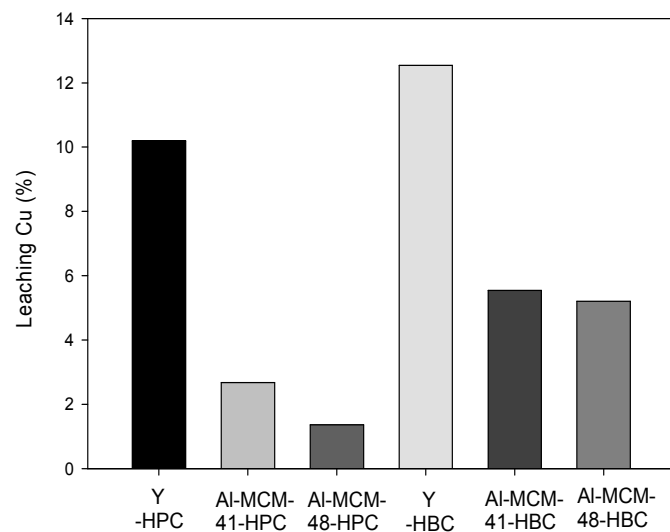

**Figure S2. Mass spectrum (EI: electron impact ionization) of by-product.**

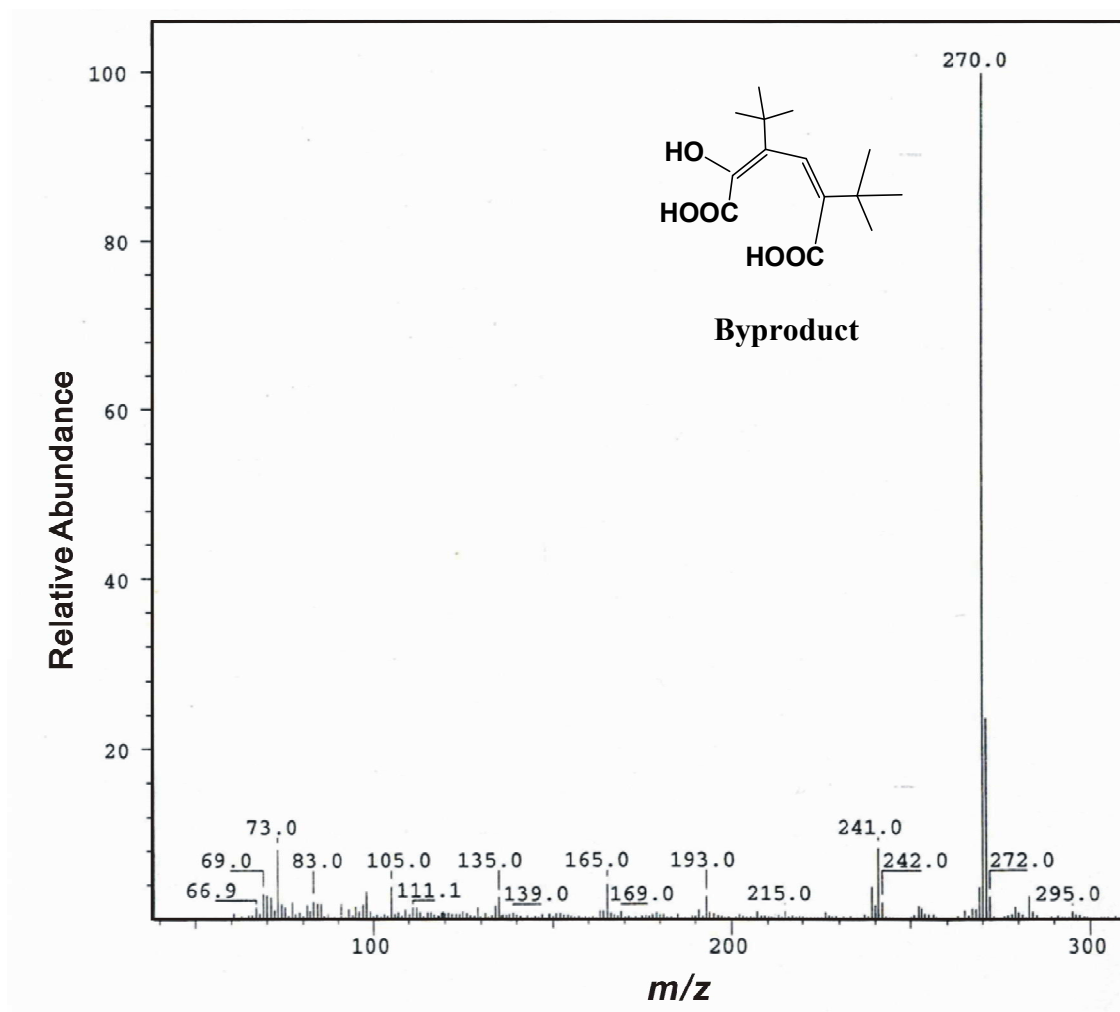

Figure S3. NMR spectrum of the major by-product.

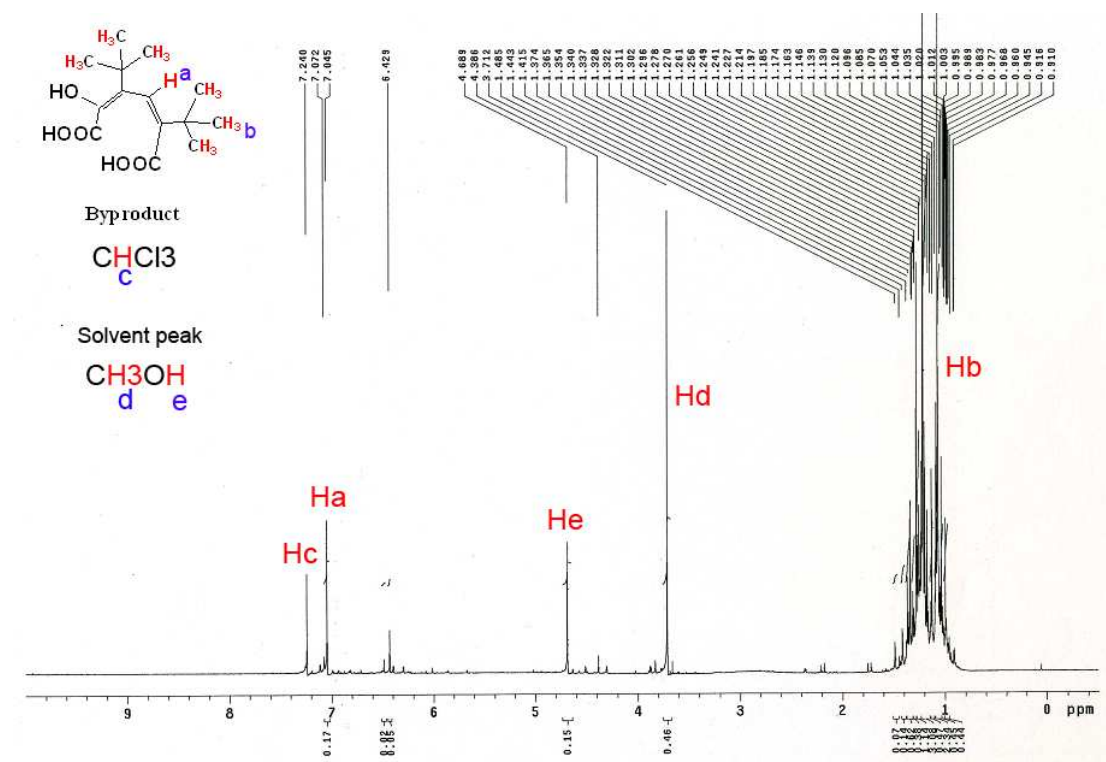

Supplement: Supplementary file 1 [file 4526518]
